# Supplementary material for: Surveillance and Genomic Analysis of Third-Generation Cephalosporin-Resistant and Carbapenem-Resistant Klebsiella pneumoniae Complex in Germany
Source: MDPI journal article supplement (doi:10.3390/antibiotics11101286), 2022-09-21
Supplement: s1 [file s1]

# Supplementary Materials

**Table S1:** Overview of the STs of the *K. pneumoniae* complex colonizing and bloodstream isolates including singletons.

| 3GCR/CR colonizing isolates<br>(n=91) |                 | 3GCR/CR bloodstream isolates<br>(n=80) |                 | 3GCS/CS bloodstream isolates<br>(n=95) |                 |
|---------------------------------------|-----------------|----------------------------------------|-----------------|----------------------------------------|-----------------|
| ST                                    | No. of isolates | ST                                     | No. of isolates | ST                                     | No. of isolates |
| ST307*                                | 10              | ST307*                                 | 13              | ST37*                                  | 7               |
| ST219                                 | 5               | ST15*                                  | 7               | ST14*                                  | 3               |
| ST45                                  | 5               | ST48*                                  | 7               | ST17*                                  | 3               |
| ST14*                                 | 4               | ST219                                  | 5               | ST23                                   | 2               |
| ST17*                                 | 4               | ST147*                                 | 4               | ST35                                   | 2               |
| ST405                                 | 4               | ST13                                   | 3               | ST39                                   | 2               |
| ST15*                                 | 3               | ST101*                                 | 3               | ST160                                  | 2               |
| ST1653                                | 3               | ST4                                    | 2               | ST641                                  | 2               |
| ST20*                                 | 2               | ST25                                   | 2               | ST2599                                 | 2               |
| ST29                                  | 2               | ST392                                  | 2               | ST3640                                 | 2               |
| ST37*                                 | 2               | ST405                                  | 2               | ST6069                                 | 2               |
| ST13                                  | 1               | ST607                                  | 2               | ST2                                    | 1               |
| ST25                                  | 1               | ST1825                                 | 2               | ST20*                                  | 1               |
| ST35                                  | 1               | ST8                                    | 1               | ST22                                   | 1               |
| ST36                                  | 1               | ST11*                                  | 1               | ST29                                   | 1               |
| ST48*                                 | 1               | ST17*                                  | 1               | ST30                                   | 1               |
| ST76                                  | 1               | ST37*                                  | 1               | ST36                                   | 1               |
| ST133                                 | 1               | ST39                                   | 1               | ST45                                   | 1               |
| ST147*                                | 1               | ST45                                   | 1               | ST55                                   | 1               |
| ST152                                 | 1               | ST152                                  | 1               | ST76                                   | 1               |
| ST211                                 | 1               | ST258*                                 | 1               | ST86                                   | 1               |
| ST231                                 | 1               | ST268                                  | 1               | ST101*                                 | 1               |
| ST242                                 | 1               | ST273                                  | 1               | ST111                                  | 1               |
| ST309                                 | 1               | ST280                                  | 1               | ST145                                  | 1               |
| ST323                                 | 1               | ST310                                  | 1               | ST188                                  | 1               |
| ST327                                 | 1               | ST353                                  | 1               | ST230                                  | 1               |
| ST432                                 | 1               | ST383*                                 | 1               | ST253                                  | 1               |
| ST433                                 | 1               | ST395*                                 | 1               | ST268                                  | 1               |
| ST449                                 | 1               | ST420                                  | 1               | ST279                                  | 1               |
| ST469                                 | 1               | ST552                                  | 1               | ST292                                  | 1               |
| ST502                                 | 1               | ST870                                  | 1               | ST317                                  | 1               |
| ST513                                 | 1               | ST1106                                 | 1               | ST347                                  | 1               |
| ST551                                 | 1               | ST1322                                 | 1               | ST353                                  | 1               |
| ST628                                 | 1               | ST1999                                 | 1               | ST355                                  | 1               |
| ST631                                 | 1               | ST3251                                 | 1               | ST363                                  | 1               |
| ST716                                 | 1               | ST4023                                 | 1               | ST380                                  | 1               |
| ST719                                 | 1               | ST5588                                 | 1               | ST530                                  | 1               |
| ST776                                 | 1               | ST6075                                 | 1               | ST587                                  | 1               |
| ST791                                 | 1               | ST6078                                 | 1               | ST639                                  | 1               |

|              |    |        |    |
|--------------|----|--------|----|
| ST849        | 1  | ST788  | 1  |
| ST866        | 1  | ST792  | 1  |
| ST869        | 1  | ST846  | 1  |
| ST985        | 1  | ST857  | 1  |
| ST1040       | 1  | ST882  | 1  |
| ST1626       | 1  | ST981  | 1  |
| ST1799       | 1  | ST1107 | 1  |
| ST1845       | 1  | ST1140 | 1  |
| ST1962       | 1  | ST1180 | 1  |
| ST2010       | 1  | ST1540 | 1  |
| ST2279       | 1  | ST1562 | 1  |
| ST2407       | 1  | ST1564 | 1  |
| ST2974       | 1  | ST1608 | 1  |
| ST3191       | 1  | ST1727 | 1  |
| ST3249       | 1  | ST1791 | 1  |
| ST6071       | 1  | ST2355 | 1  |
| ST6082       | 1  | ST2386 | 1  |
| ST6083       | 1  | ST2388 | 1  |
| ST6084       | 1  | ST2843 | 1  |
|              |    | ST2994 | 1  |
|              |    | ST3074 | 1  |
|              |    | ST3379 | 1  |
|              |    | ST4118 | 1  |
|              |    | ST4156 | 1  |
|              |    | ST4585 | 1  |
|              |    | ST4609 | 1  |
|              |    | ST4860 | 1  |
|              |    | ST5682 | 1  |
|              |    | ST6066 | 1  |
|              |    | ST6067 | 1  |
|              |    | ST6068 | 1  |
|              |    | ST6072 | 1  |
|              |    | ST6073 | 1  |
|              |    | ST6074 | 1  |
|              |    | ST6076 | 1  |
|              |    | ST6077 | 1  |
|              |    | ST6079 | 1  |
|              |    | ST6080 | 1  |
| Total of STs | 58 |        | 77 |

\*HiR clones

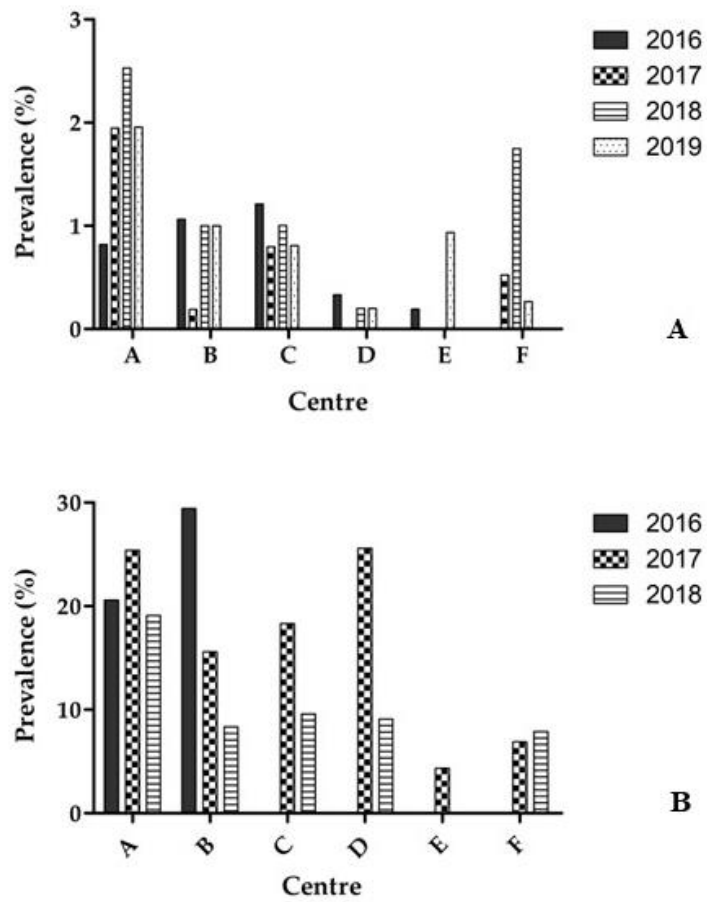

**Figure S1. (A).** Prevalence of 3GCR *K. pneumoniae* complex carriage of patients on hospital admission per year and centre. **(B).** Prevalence of 3GCR among 880 *K. pneumoniae* complex bloodstream isolates per year and centre.

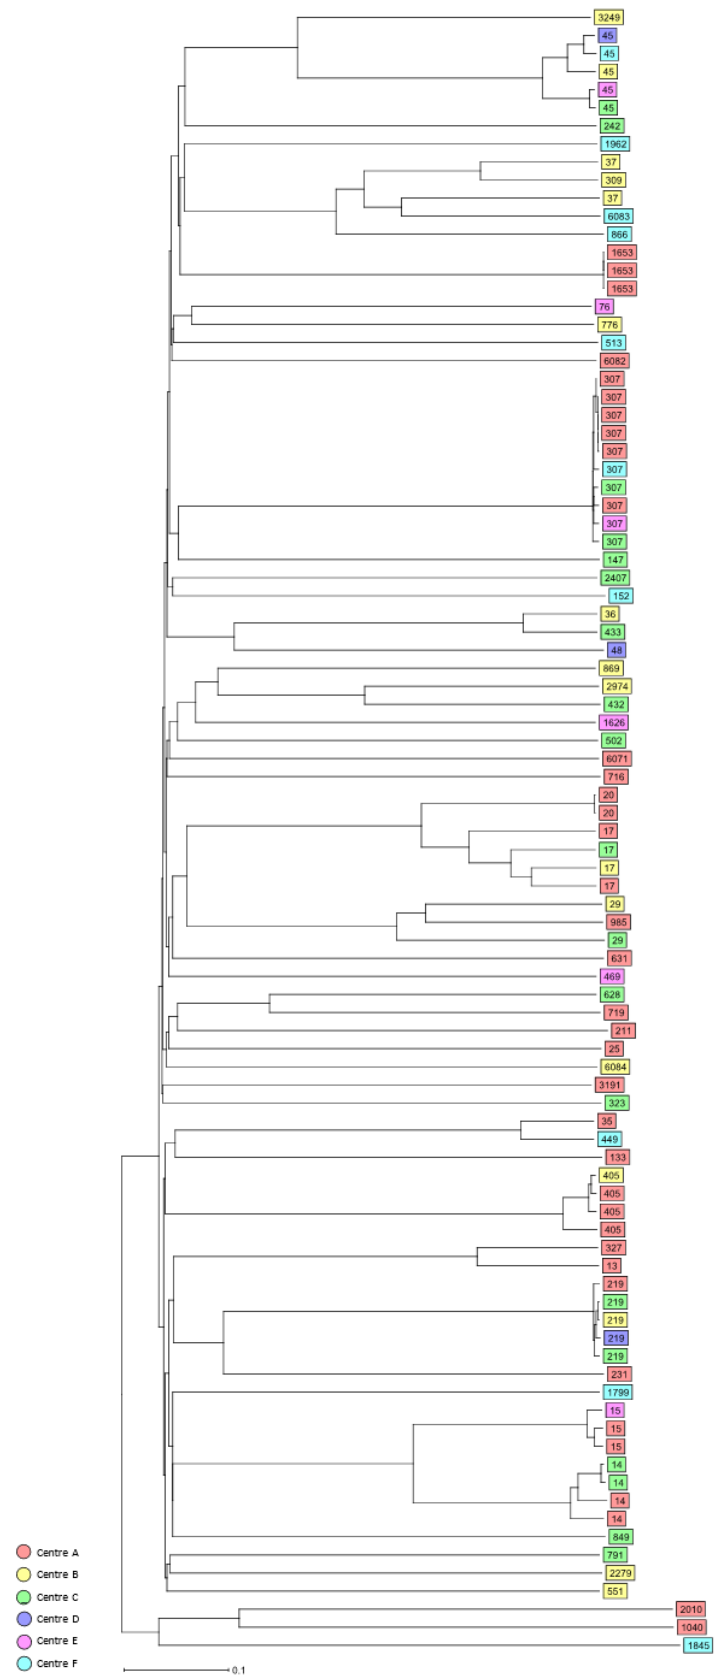

**Figure S2.** Dendrogram generated using Ridom SeqSphere+ for the 3GCR/CR colonizing *K. pneumoniae* complex isolates including HiR clones (n=91) coloured by study centre and identified by ST type, ignoring missing values. Each box represents one isolate from an individual patient based on sequence analysis of 2358 cgMLST target genes.

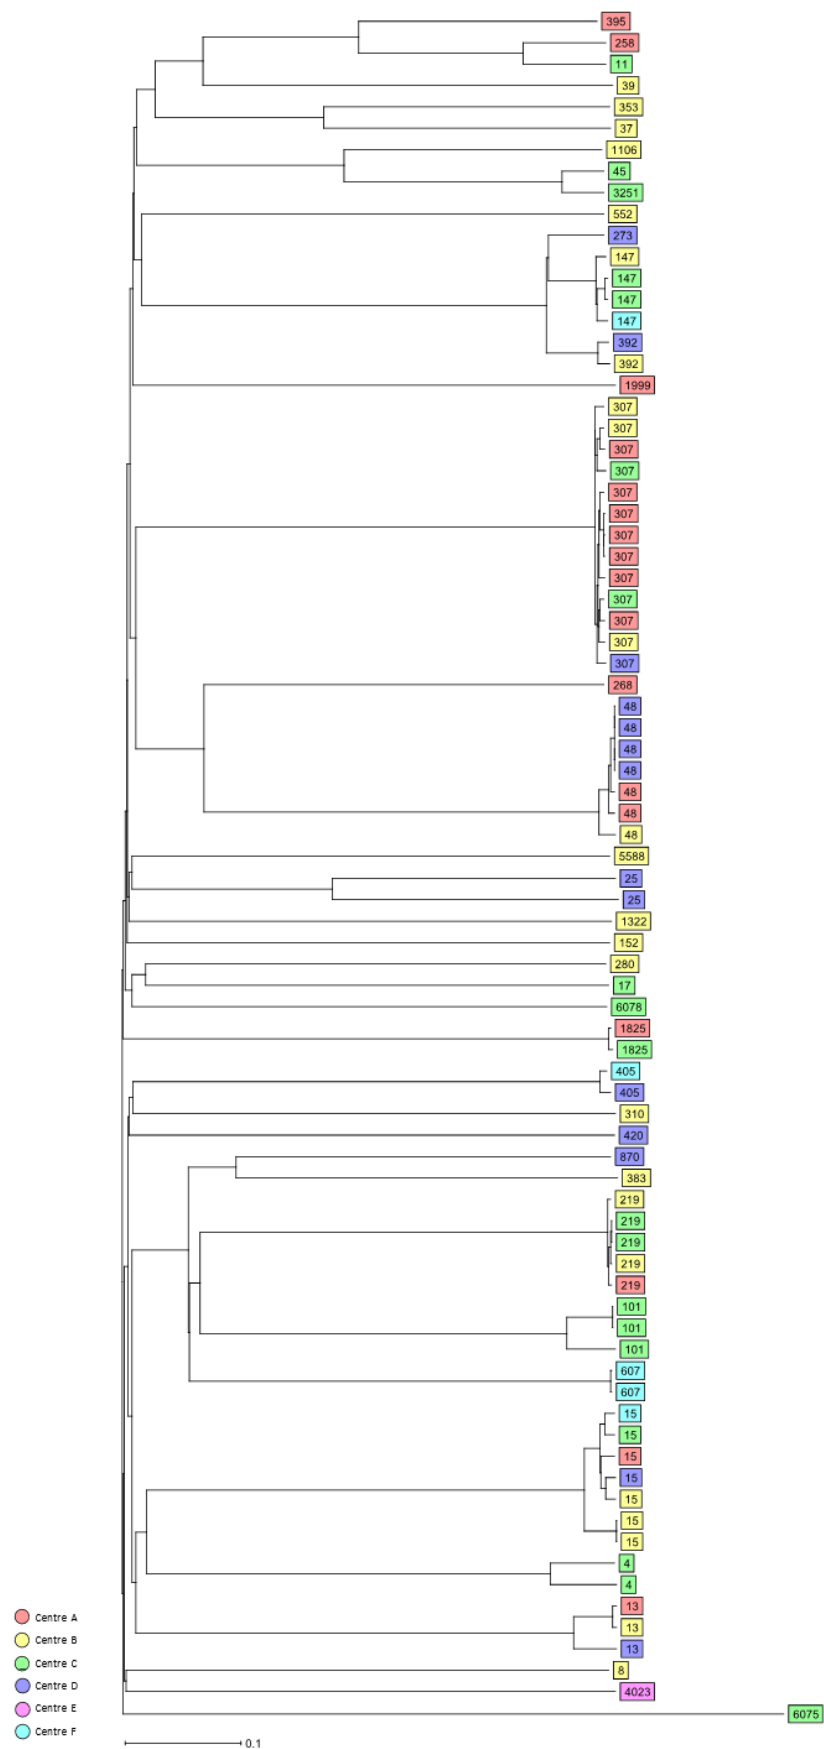

**Figure S3.** Dendrogram generated using Ridom SeqSphere+ for the 3GCR/CR *K. pneumoniae* complex bloodstream isolates including HiR clones (n=80) coloured by study centre and identified by ST type, ignoring missing values. Each box represents one isolate from an individual patient based on sequence analysis of 2358 cgMLST target genes.

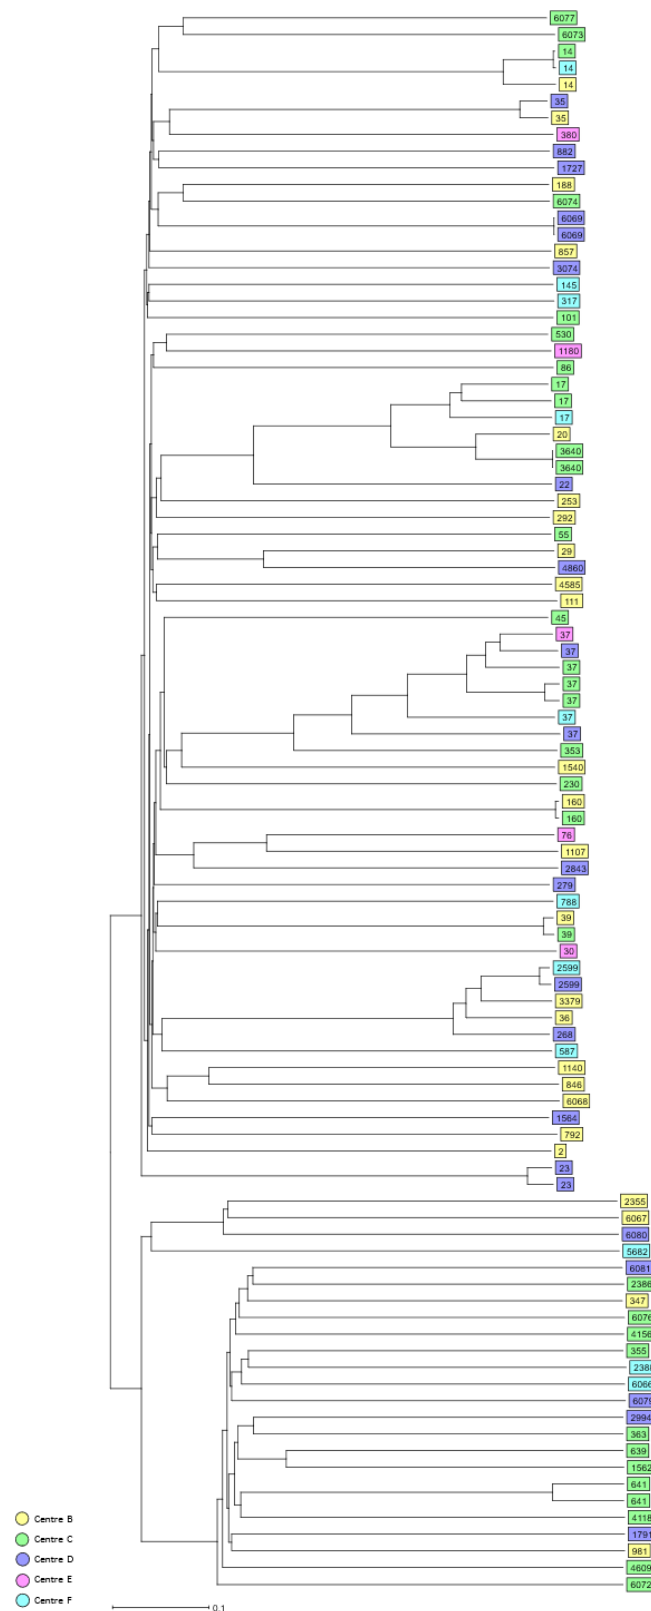

**Figure S4.** Dendrogram generated using Ridom SeqSphere+ for the 3GCS/CS *K. pneumoniae* complex bloodstream isolates including HiR clones (n=95) coloured by study centre and identified by ST type, ignoring missing values. Each box represents one isolate from an individual patient based on sequence analysis of 2358 cgMLST target genes.
